# Supplementary material
Source: PubMed Central journal article supplement (PMC3069195)
Supplement: 1014514108_pnas.201014514SI.pdf [file 1014514108_pnas.201014514SI.pdf]

# Supporting Information

Lora et al. 10.1073/pnas.1014514108

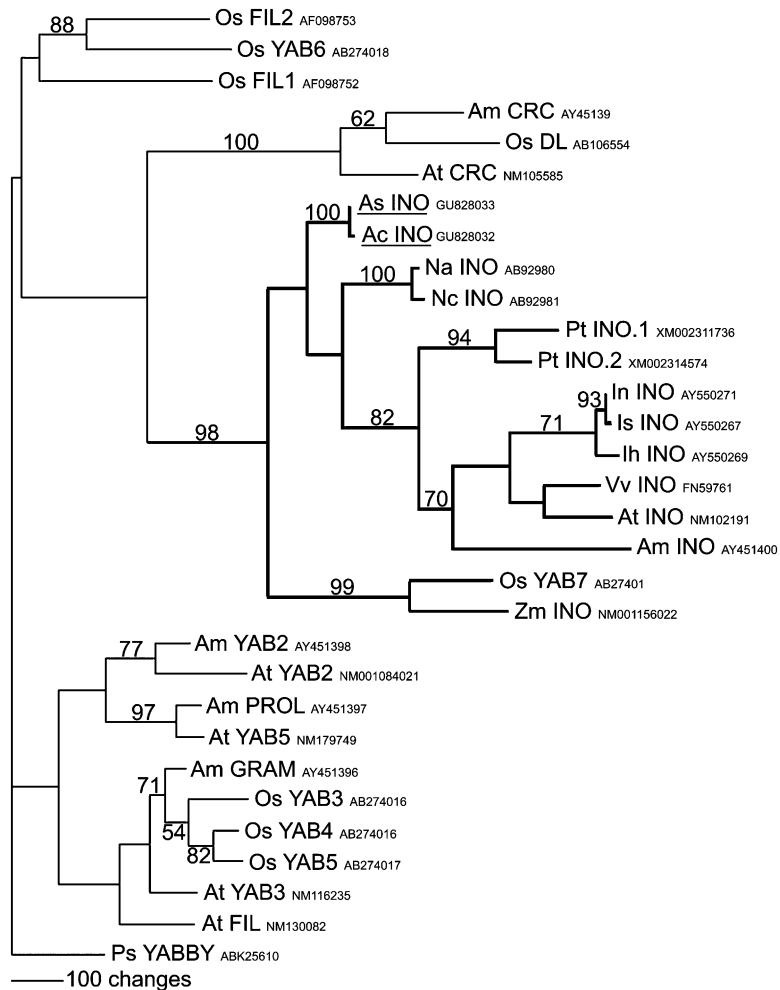

**Fig. S1.** Phylogenetic relationships of isolated *Annona* genes. The single shortest tree of YABBY protein sequences resulting from 100 replications of a random addition heuristic search under maximum parsimony (recovered in 97/100 replicates, length = 6,647 in arbitrary units; excluding uninformative characters, consistency index = 0.6256, homoplasy index = 0.3744, retention index = 0.6930). Numbers adjacent to nodes indicate support from bootstrap analysis. The clearly resolved clade of INO orthologs is in thicker lines and *Annona* sequences determined in the current study are underlined. Species included in the tree comprise the following: Ac, *Annona cherimola*; Am, *Antirrhinum majus*; As, *Annona squamosa*; At, *Arabidopsis thaliana*; Ih, *Impatiens hookeriana*; In, *Impatiens niamniamensis*; Is, *Impatiens sodenii*; Na, *Nymphaea alba*; Nc, *Nymphaea colorata*; Os, *Oryza sativa*; Ps, *Picea sitchensis*; Pt, *Populus trichocarpa*; Vv, *Vitis vinifera*; Zm, *Zea mays*. GenBank accession numbers are given at the right of each sequence.

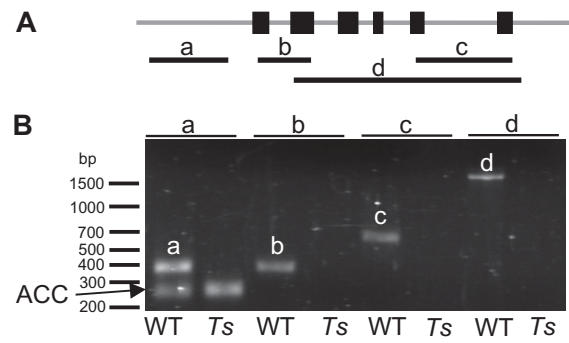

**Fig. S2.** *INO* gene fragments could not be amplified from *Ts*. (A) Primers were designed to the *A. cherimola INO* sequence to enable amplification of the indicated regions. (B) All primer pairs amplified the expected fragments from wild-type (WT) *A. squamosa*. These same *INO*-specific primer pairs failed to amplify fragments from *Thai seedless (Ts)* DNA, whereas primers specific to an *Annona* 1-aminocyclopropane-1-carboxylate synthase (ACC) gene readily amplified the expected fragment from both wild-type and *Ts* DNA samples even when in a reaction that included primers that failed to amplify an *INO* fragment (lanes "a").

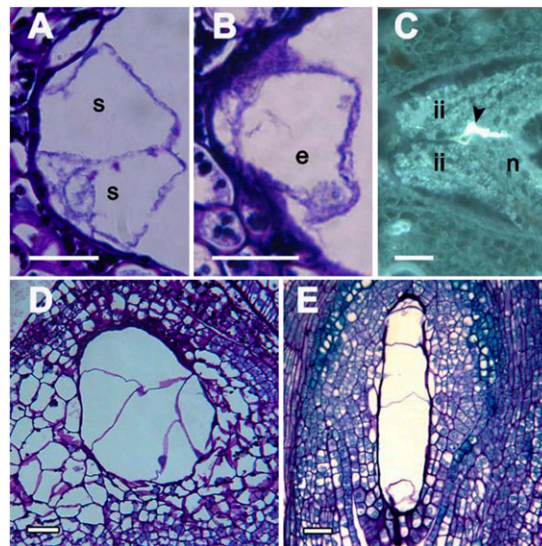

**Fig. S3.** Embryo sac anatomy and pollen tube growth. (A–D) Ovule sections of *A. squamosa Ts*. (A) Two synergid cells with nuclei and cytoplasm at the base of the embryo sac. (B) Egg cell. (C) Aniline blue staining of a *Ts* ovule shows a brightly fluorescent pollen tube that has passed through the micropyle and penetrated the nucellus (arrowhead). (D) Early-degenerating endosperm 10 d after pollination. (E) Cellular endosperm 8 d after pollination in *A. cherimola*. [Scale bar, 10  $\mu$ m (A and B); 20  $\mu$ m (C–E).] e, egg cell; ii, inner integument; n, nucellus; s, synergid cell.

**Table S1. Oligonucleotide primers used in this study**

| Primer name         | Primer sequence (5'-3')    | Temperature (°C) | Fig. 4 band |
|---------------------|----------------------------|------------------|-------------|
| LMINO1              | CCTAAATGAAGGGTTTACATGTGGC  | 60               | a           |
| LMINO2              | GCCCACCTTCATTTGCTCCTTGG    | 60               | a           |
| LMINO3              | ATGGACATGTCTACATAACAACCAC  | 60               | b           |
| LMINO4              | CGAGGAACTGCAGTGGAAACAAATG  | 60               | b           |
| LMINO5*             | AGAAGAGATCCAAAGGCTCAAGG    | 60               | c           |
| LMINO6              | GCAGCTCTCTATCTCCTTTG       | 60               | c           |
| LMINO7              | GCGTGTAAGCAGATTCCCTTTACC   | 60               | d           |
| LMINO8              | AGCGTCCCATGCAGCAGCTTGTT    | 60               | d           |
| LMAT1               | GATGAGATCTACTCGGGTCC       | 60               | ACC         |
| LMAT2               | GAGGAGATCAAGCTGAAGCTAGAC   | 60               | ACC         |
| LMINOa <sup>†</sup> | GGTGACGGTCAGATGTGGCCATTGC  | 60               |             |
| LMINOb <sup>†</sup> | TGTTGGGCTGCTTAGCCTTGAGCC   | 60               |             |
| GW1.3b*             | ACGTGCTCCATCAGCATATAACCG   | 60               |             |
| GW1.5a*             | CATCACATTAACGGAAAGGAGACC   | 60               |             |
| GW1.5b*             | AATGGCCACATCTGACCGTCACC    | 60               |             |
| GW2.3a*             | GGTAAAGGGAATCTGCTTACACGC   | 60               |             |
| GW2.3b*             | CTTCTCTTCTCCTCCAAAATCACCC  | 60               |             |
| GW2.5a*             | GGAGAGGCACAGTAGCCGAATGATT  | 60               |             |
| GW2.5b*             | GCTACAGTCATGTAAGTGGTCCAG   | 60               |             |
| GW3.3a*             | AGCTATAGTAGCAGAAGATAGCTACA | 60               |             |
| GW3.3b*             | AAATAAAAGGAAGGAGAGGCACAGTA | 60               |             |
| GW3.5a*             | ATAAATTTCTTATATGAAGGGAAC   | 60               |             |
| GW3.5b*             | AAATTTCTTATATGAAGGGAACAC   | 60               |             |

\*Primers used for the Genome Walker protocol.

<sup>†</sup>Primers designed from the first isolated fragment of *INO* genomic sequence from *A. cherimola*.
